# Supplementary material
Source: HighWire-hosted journal article supplement (https://bmjopen.bmj.com/content/12/6/e058303)
Supplement: inline-supplementary-material-2 [file inline-supplementary-material-2.pdf]

## Supplementary file 2

Interview guide in Swedish.

### Intervjuguide till semi-strukturerade intervjuer med personer i behandling av RA

Hej, du kommer nu att delta i en intervju för att undersöka hur personer i behandling av ledgångsreumatism värderar olika egenskaper hos läkemedel och hur de diskuterar egenskaperna med sin reumatolog.

Vi har avsatt 1,5 timme för denna diskussion men vi kan avsluta tidigare om vi känner oss klara. Resultaten från den här intervjun kommer att presenteras på gruppnivå. Det du säger kommer inte att kunna kopplas tillbaka till dig personligen. Citat från intervjun kan komma att presenteras i vetenskapliga artiklar och populärvetenskapliga sammanfattningar. Det är helt frivilligt att delta i den här intervjun och du kan välja att avbryta när du vill. Intervjun kommer inte att påverka din befintliga vård. Ingen obehörig kommer att få ta del av dina svar.

- Är det någonting du undrar över innan vi påbörjar intervjun?
- Ger du ditt informerade samtycke att delta i denna intervju som kommer att spelas in?
- Hur kändes det när du fick diagnosen RA?
- Vad är viktigt för dig när det gäller din behandling av ledgångsreumatism?
  - Varför?
  - Har du erfarenhet av några biverkningar?
- Finns det någonting annat som handlar om din behandling som också är viktigt?
  - Varför är de viktiga för dig?
- Hur ser du på att kombinera din behandling med din livsstil?
- Finns det någonting som skulle kunna underlätta för dig om du fick ändra på någonting i din behandling?
- Hur upplever du det att diskutera din behandling med din reumatolog?
- Upplevde du att du blev lyssnad på när du pratade om behandling med din reumatolog?
- Hur ser du på att läkare använder algoritmer för att välja ut vilken behandling som skulle passa dig bäst? (förklara begreppet precisions medicin).
- Hur ser du på att läkare använder resultat från preferensstudier (förklara vad preferensstudier är) för att diskutera vilken behandling som skulle passa dig bäst?
- Vad tycker du om att vara delaktig i beslutet av din behandling?
  - Hur mycket ska man som patient få bestämma om sin behandling?
- Finns det någonting som skulle kunna underlätta för dig när du pratar behandling med din reumatolog?
  - Finns det någon typ av informationsunderlag som skulle kunna underlätta ditt samtal med din reumatolog?
- Finns det någonting som du skulle vilja berätta för mig som du inte fått sagt under intervjun?

Kort sammanfattning av det som sades under intervjun.

Tacka deltagaren och påminn om mina personuppgifter om det kommer upp frågor efter intervjun.
