# Supplementary material
Source: HighWire-hosted journal article supplement (https://bmjopen.bmj.com/content/12/6/e058303)
Supplement: inline-supplementary-material-3 [file inline-supplementary-material-3.pdf]

### Supplementary file 3

#### Content analysis

| Meaning units                                                                                                                                                                                                                                                                                                                                                                                                                           | Condensed meaning units                                                                                                                                                                   | Codes                             | Sub-categories                             | Main categories                                   |
|-----------------------------------------------------------------------------------------------------------------------------------------------------------------------------------------------------------------------------------------------------------------------------------------------------------------------------------------------------------------------------------------------------------------------------------------|-------------------------------------------------------------------------------------------------------------------------------------------------------------------------------------------|-----------------------------------|--------------------------------------------|---------------------------------------------------|
| <ul style="list-style-type: none"> <li>I am willing to try it, because of the promising research, I believe in the results.</li> <li>I would try it at once, I have read about it and I would like to start upfront with precision medicine instead of going the standardized way.</li> <li>As a patient you need to take tests all the time, I would accept a blood test and additional exams.</li> </ul>                              | Patients trust in research and they are willing to try precision medicine because they are already used to tight controls.                                                                | Positive to new approach          | A positive attitude towards a new approach | Patients' desires and needs in precision medicine |
| <ul style="list-style-type: none"> <li>We did have a discussion, they wanted a much higher dose for me. I felt like she already had a plan for me.</li> <li>I think you should have some influence, defiantly. It is important to know that there are options and to start discussions with 'what is important for you?'</li> <li>I would rather go for a more personalised precision medicine than a standardized approach.</li> </ul> | An individualizes treatment approach requires rheumatologists to be more patient-centered by asking patient's what is most important instead of just following the standardized approach. | Questioning standardized approach |                                            |                                                   |
| <ul style="list-style-type: none"> <li>Patients influencing precision medicine requires patients to get a lot of information from the health care professional.</li> <li>My rheumatologist just gave me a folder and said 'go home and read'.</li> <li>There is a big knowledge gap if you don't even know the disease. You also need easier explanations.</li> </ul>                                                                   | Patients' need to be properly informed to increase patient-centeredness in precision medicine.                                                                                            | Information format                | To be properly informed                    |                                                   |
| <ul style="list-style-type: none"> <li>I would have needed some kind of explanations, what are my alternatives?</li> <li>I would have needed more information on the disease</li> </ul>                                                                                                                                                                                                                                                 | Patients need to be prepared to be able to discuss treatment. They need to know that there are potential treatment alternatives, and what they are.                                       | Available treatment alternatives  |                                            |                                                   |

|                                                                                                                                                                                                                                                                                                                                                                                           |                                                                                                                                                                                                                                                                  |                                 |                                                            |  |
|-------------------------------------------------------------------------------------------------------------------------------------------------------------------------------------------------------------------------------------------------------------------------------------------------------------------------------------------------------------------------------------------|------------------------------------------------------------------------------------------------------------------------------------------------------------------------------------------------------------------------------------------------------------------|---------------------------------|------------------------------------------------------------|--|
| <ul style="list-style-type: none"> <li>I have read a lot about treatment by myself, but it is hard to find information.</li> </ul>                                                                                                                                                                                                                                                        |                                                                                                                                                                                                                                                                  |                                 |                                                            |  |
| <ul style="list-style-type: none"> <li>I haven't talked to anybody about it, because I just had a quick call.</li> <li>They told me that I could always give them a call, I felt that they cared for me.</li> <li>I had a great conversation on the phone, I told my doctor that I was devastated, she told me that we need to change your treatment.</li> </ul>                          | Having someone to talk to is important for patients to feel that they are being taken care of.                                                                                                                                                                   | Someone to talk to              | To be able to express one's preferences                    |  |
| <ul style="list-style-type: none"> <li>Nobody have ever asked me how I feel.</li> <li>I didn't get the help I wanted so I went to a private rheumatologist.</li> <li>They talk a lot about asking questions. But you need to prepare yourself even before you start formulating your questions.</li> <li>It may be an idea to have standardized questions to support patients.</li> </ul> | It is important to be confident in yourself, because you need to ask questions to get the information you need. Some form of preparatory material, like standardized questions, may support patients' confidence in asking questions and expressing their needs. | Being able to communicate       |                                                            |  |
| <ul style="list-style-type: none"> <li>I want to focus on my situation and to have some kind of plan I place for me.</li> <li>A treatment plan would be great to know what to expect.</li> <li>I want my treatment pathway to be more patient-centered for me to influence treatment decisions.</li> </ul>                                                                                | Patients want to design an individual treatment plan together with their rheumatologist, because they want to know what to expect. They want the plan to be based on their personal treatment preferences.                                                       | Considering patient preferences | Have a individual treatment plan                           |  |
| <ul style="list-style-type: none"> <li>I would have needed to focus on more than medical interventions and to know the time frame for my treatment.</li> <li>I would have needed a structure and to know the time frame for each treatment intervention.</li> </ul>                                                                                                                       | A clear structure for the individual plan would also include a time frame for patients to be more involved in making treatment decisions.                                                                                                                        | Time frame                      |                                                            |  |
| <ul style="list-style-type: none"> <li>I have learned to do thing in my own speed. I have to get to know my own capacity.</li> <li>On a good day, I can do everything, and some days I just can't do anything with my hands.</li> </ul>                                                                                                                                                   | Getting RA can become a daily physical struggle, like going from being active to barely managing every day activities. Patients' needs support from a health care professional to adapt treatment and                                                            | Physical functional capacity    | Identifying patients' needs for support and personal goals |  |

|                                                                                                                                                                                                                                                                                                                                                                                                                                                                                            |                                                                                                                                                                                                          |                                  |                                                               |                                                    |
|--------------------------------------------------------------------------------------------------------------------------------------------------------------------------------------------------------------------------------------------------------------------------------------------------------------------------------------------------------------------------------------------------------------------------------------------------------------------------------------------|----------------------------------------------------------------------------------------------------------------------------------------------------------------------------------------------------------|----------------------------------|---------------------------------------------------------------|----------------------------------------------------|
| <ul style="list-style-type: none"> <li>I think it I quit scary, some days I can't even dress myself.</li> <li>I had to fix everything myself without any support from health care professionals.</li> </ul>                                                                                                                                                                                                                                                                                | physical activities to their new life style.                                                                                                                                                             |                                  |                                                               |                                                    |
| <ul style="list-style-type: none"> <li>It was overwhelming to get this diagnosis, my whole life changed and I got an inner crisis that I had to deal with myself.</li> <li>There was a team around me that supported me in the beginning, I got to see a psychologist.</li> <li>I would like to talk so someone because I am sad and worried.</li> </ul>                                                                                                                                   | It can be overwhelming when getting a chronic diagnosis like RA, patients also needs support by a health care professional to manage their psychosocial functional capacity in their new life situation. | Psychosocial functional capacity |                                                               |                                                    |
| <ul style="list-style-type: none"> <li>I think your confidence depends on the health care professional. You need to feel safe and that you can have an impact on treatment choices.</li> <li>I meet a very competent rheumatologist, she was engaged in me but also very strict. I didn't dare to talk back to her.</li> <li>To feel comfortable, obviously I am always uncomfortable when seeing my rheumatologist, the situation is difficult. I want to feel more confident.</li> </ul> | It is important to be in a safe environment, where you can trust health care professionals, to be able to express what is important and to ask personal questions.                                       | Confidence                       | Having a safe environment to express personal matters         | Patients requirements of health care professionals |
| <ul style="list-style-type: none"> <li>My first doctor started off by letting me know that there are a lot go good alternatives for me. That was reassuring.</li> <li>She understood my situation when I called her up and told her about my mental breakdown.</li> <li>You get your hopes up if you see that you have someone on your side.</li> </ul>                                                                                                                                    | As a newly diagnosed patient with RA, it may be important for you to feel reassured, as in trusting health care professionals in that you still have a future, despite having RA.                        | Reassured                        |                                                               |                                                    |
| <ul style="list-style-type: none"> <li>My first rheumatologist only talked about medication. I had no idea what RA was.</li> <li>There was no room for communication. The situations is unequal, you are in chock and you don't understand anything, while the</li> </ul>                                                                                                                                                                                                                  | Health care professionals needs to invite patients in discussions by starting at the level where the patients are at, and adjust the communication to that specific patient and situation.               | Adapt communication              | Having a two-way communication with health care professionals |                                                    |

|                                                                                                                                                                                                                                                                                                                                                                    |                                                                                                                                                                                                                             |                                  |  |  |
|--------------------------------------------------------------------------------------------------------------------------------------------------------------------------------------------------------------------------------------------------------------------------------------------------------------------------------------------------------------------|-----------------------------------------------------------------------------------------------------------------------------------------------------------------------------------------------------------------------------|----------------------------------|--|--|
| rheumatologists have a clinical approach.                                                                                                                                                                                                                                                                                                                          |                                                                                                                                                                                                                             |                                  |  |  |
| <ul style="list-style-type: none"> <li>Nobody ever listens to me.</li> <li>I felt totally excluded, I have a confidence in my rheumatologist but 'I would have needed to ask' [get an opportunity to ask more questions].</li> <li>She called me late on my phone, 'I don't have any time, I have to go on' I didn't feel that she had any time for me.</li> </ul> | As a patient, you often feel excluded from treatment decisions. It is difficult to be involved in treatment decisions if nobody asks you what you want.                                                                     | Including patients in decisions  |  |  |
| <ul style="list-style-type: none"> <li>She didn't want to increase my medication intervals, I wanted tighter intervals to be able to work out. But, that is what's keeping me healthy.</li> <li>It should never have gone this far for me to have this panic attacks in the mornings.</li> </ul>                                                                   | Health care professionals needs to account for patients' lifestyle and daily life activities in treatment decisions. Some patients may focus more on physical goals, while other focus more on psychosocial treatment goals | Considering patients' daily life |  |  |
